# Supplementary material for: Antibacterial Textile Coating Armoured with Aggregation-Induced Emission Photosensitisers to Prevent Healthcare-Associated Infections
Source: MDPI journal article supplement (doi:10.3390/molecules29061209), 2024-03-08
Supplement: s1 [file s1]

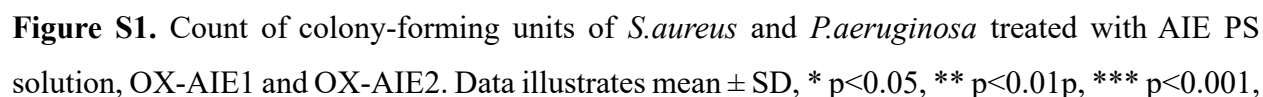

\*\*\*\*  $p < 0.0001$ . The \* shows a significant difference compared to the AIE solution by 1-way ANOVA.

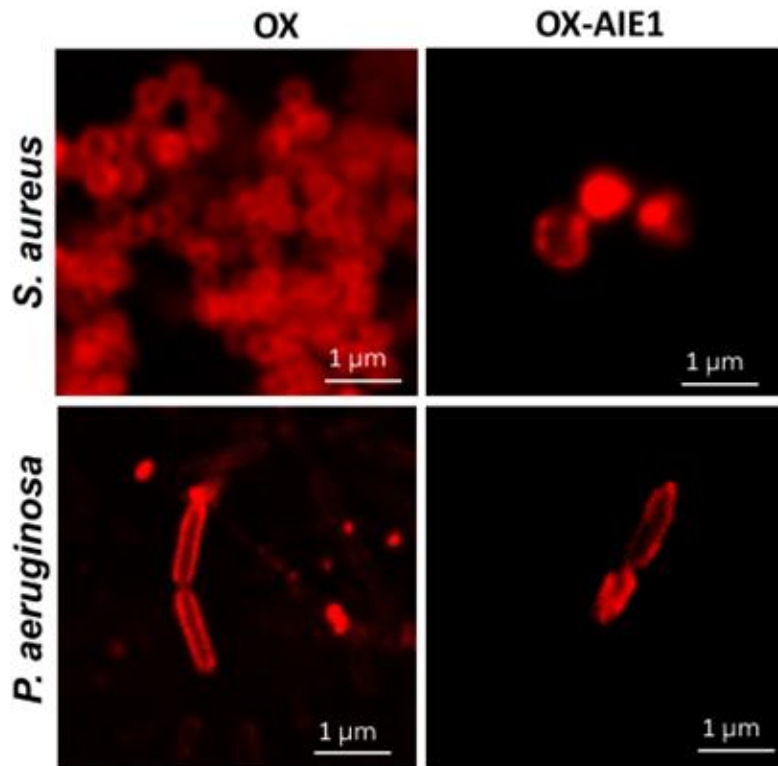

**Figure S2.** Confocal images representing cell permeability experiments of *S.aureus* and *P.aeruginosa* treated with OX and OX-AIE1.
